# Supplementary material
Source: Springer Nature journal article supplement (https://www.springermedizin.de/resource/supplementary/12885_2007_1094_MOESM1_ESM.pdf/9471102)
Supplement: MOESM1 [file 9471102]

*PB of lung cancer patient*  
*PF of lung cancer patient*  
*PB of pneumonia patient*  
*PF of tuberculo pleurisy patient*  
*PB of healthy*  
*PB of cardia cancer patient*

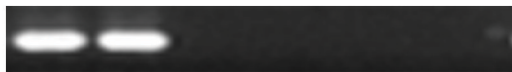

*LunX*

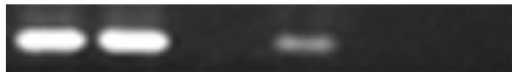

*CK19*

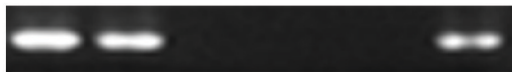

*CEA*

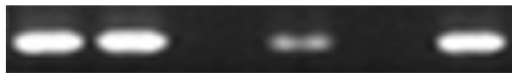

*VEGF-C*

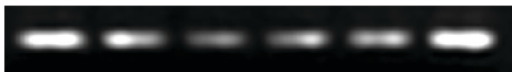

*hnRNP A2/B1*

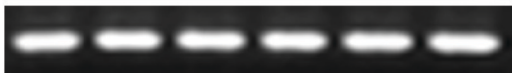

*$\beta$ -actin*
